# Supplementary material for: Nucleus-Independent Chemical Shift (NICS) as a Criterion for the Design of New Antifungal Benzofuranones
Source: MDPI journal article supplement (doi:10.3390/molecules26165078), 2021-08-21
Supplement: s1 [file s1]

# Nucleus-Independent Chemical Shift (NICS) as a Criterion for the Design of New Antigungal Benzofuranones.

María de los Ángeles Zermeno-Macías, Marco Martín González-Chávez, Francisco Méndez, Arlette Richaud, Rodolfo González-Chávez, Luis Enrique Ojeda-Fuentes, Perla del Carmen Niño-Moreno and Roberto Martínez

## Supplementary materials

|                                                                                                                                 |       |
|---------------------------------------------------------------------------------------------------------------------------------|-------|
| Reference for MIC in vitro of 6, 7a-g and 8a-g against yeast and filamentous fungus.                                            | ....1 |
| Table S1. Equations for simple linear regression NICS (0) and NICS (1) for series I: compounds 6 and 7a-g.                      | ....1 |
| Table S2. Equations for simple regression NICS (0) and NICS (1) for series II: compounds 8a-g.                                  | ....2 |
| Table S-3. Summary of Mann-Whitney U test for the comparison of antifungal activity between indol-4-ones and benzofuran-4-ones. | ....2 |
| Table S-4. Summary of Mann-Whitney U test for the different comparisons between calculated and experimental MICs.               | ....3 |
| Atomic coordinates for :                                                                                                        |       |
| 14                                                                                                                              | ....4 |
| 15-1                                                                                                                            | ....5 |
| 15-3                                                                                                                            | ....6 |
| 15-11                                                                                                                           | ....7 |
| 15-15                                                                                                                           | ....8 |
| 15-28                                                                                                                           | ....9 |
| 15-32                                                                                                                           | ...10 |
| 15-33                                                                                                                           | ...11 |
| 15-34                                                                                                                           | ...12 |
| 15-41                                                                                                                           | ...13 |

The MIC values in vitro of **6**, **7a-g** and **8a-g** against yeast and filamentous fungus were obtained from:

Zermeño-Macías, M.D.I.Á.; González-Chávez, M.M.; Méndez, F.; González-Chávez, R.; Richaud, A. Theoretical Reactivity Study of Indol-4-Ones and Their Correlation with Antifungal Activity. *Molecules* **2017**, *22*, 427. <https://doi.org/10.3390/molecules22030427>

**Table S1.** Equations for simple linear regression NICS (0) and NICS (1) for series I: compounds **6** and **7a-g**.

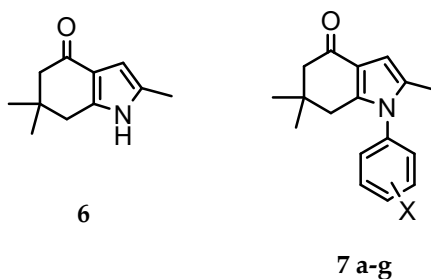

| NICS | Microorganism observed       | Testing time (h) | Equation                                                                   | <i>r</i> |
|------|------------------------------|------------------|----------------------------------------------------------------------------|----------|
| (0)  | <i>Candida albicans</i>      | 24               | MIC [mM]= -1.26 mM ppm <sup>-1</sup> NICS(0) [ppm <sup>-1</sup> ]-12.06 mM | 0.70     |
| (0)  | <i>Aspergillus niger</i>     | 48               | MIC [mM]= -0.75 mM ppm <sup>-1</sup> NICS(0) [ppm <sup>-1</sup> ]-7.12 mM  | 0.94     |
| (1)  | <i>Aspergillus niger</i>     | 72               | MIC [mM]= -1.60 mM ppm <sup>-1</sup> NICS(0) [ppm <sup>-1</sup> ]-15.22 mM | 0.90     |
|      | <i>Aspergillus fumigatus</i> | 48               | MIC [mM]= -0.71 mM ppm <sup>-1</sup> NICS(0) [ppm <sup>-1</sup> ]-6.75 mM  | 0.77     |
|      | <i>Aspergillus fumigatus</i> | 72               | MIC [mM]= -1.43 mM ppm <sup>-1</sup> NICS(0) [ppm <sup>-1</sup> ]-13.50 mM | 0.88     |
|      | <i>Aspergillus niger</i>     | 48               | MIC [mM]= -0.28 mM ppm <sup>-1</sup> NICS(1) [ppm <sup>-1</sup> ]-1.52 mM  | 0.95     |
| (1)  | <i>Aspergillus fumigatus</i> | 72               | MIC [mM]= -0.47 mM ppm <sup>-1</sup> NICS(1) [ppm <sup>-1</sup> ]-2.39 mM  | 0.91     |
|      |                              |                  |                                                                            |          |

**Table S2.** Equations for simple regression NICS (0) and NICS (1) for series II: compounds **8a-g**.

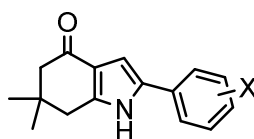

**8 a-g**

| NICS | Microorganism observed      | Testing time (h) | Equation                                                                     | <i>r</i> |
|------|-----------------------------|------------------|------------------------------------------------------------------------------|----------|
| (0)  | <i>Candida albicans</i>     | 48               | MIC [mM] = 0.14 mM ppm <sup>-1</sup> NICS(0) [ppm <sup>-1</sup> ] + 2.32 mM  | 0.75     |
|      | <i>Candida glabrata</i>     | 24               | MIC [mM] = 0.07 mM ppm <sup>-1</sup> NICS(0) [ppm <sup>-1</sup> ] + 1.16 mM  | 0.75     |
|      | <i>Candida parapsilosis</i> | 24               | MIC [mM] = -0.05 mM ppm <sup>-1</sup> NICS(0) [ppm <sup>-1</sup> ] - 0.46 mM | 0.91     |
| (1)  | <i>Candida albicans</i>     | 48               | MIC [mM] = 0.29 mM ppm <sup>-1</sup> NICS(1) [ppm <sup>-1</sup> ] + 2.96 mM  | 0.83     |
|      | <i>Candida glabrata</i>     | 24               | MIC [mM] = 0.14 mM ppm <sup>-1</sup> NICS(1) [ppm <sup>-1</sup> ] + 1.48 mM  | 0.83     |
|      | <i>Candida tropicalis</i>   | 48               | MIC [mM] = 0.59 mM ppm <sup>-1</sup> NICS(1) [ppm <sup>-1</sup> ] + 4.45 mM  | 0.81     |
|      | <i>Candida parapsilosis</i> | 24               | MIC [mM] = -0.09 mM ppm <sup>-1</sup> NICS(1) [ppm <sup>-1</sup> ] - 0.56 mM | 0.82     |

**Table S-3.** Summary of Mann-Whitney U test for the comparison of antifungal activity between indol-4-ones and benzofuran-4-ones.

| Fungi       | Testing time | z       | Mean ranks        |              | p      |
|-------------|--------------|---------|-------------------|--------------|--------|
|             |              |         | Benzofuran-4-ones | Indol-4-ones |        |
| Yeast       | 24           | 4.6533  | 33.92             | 15.08        | <0.001 |
|             | 48           | 1.7235  | 28.00             | 21.00        | 0.0848 |
| Filamentous | 48           | -2.4735 | 5.50              | 11.50        | 0.0134 |
|             | 72           | -2.4735 | 5.50              | 11.50        | 0.0134 |

*Equality analysis between calculated and experimental MIC data (See Table S-4).*

The analyses tested were:

- a) Using equations obtained with the simple linear regression from the antifungal activity of indol-4-ones of series I *vs* NICS (0) and NICS (1).
  - i. With NICS (1): Filamentous fungi 48/72 h, filamentous fungi at 48 h, and filamentous fungi at 72 h.
- b) Using equations obtained with the simple linear regression from the antifungal activity of indol-4-ones of series II *vs* NICS (0) and NICS (1).
  - i. With NICS (0): Yeasts 24 /48 h, yeasts 24 h, yeasts 48 h.
  - ii. With NICS (1): Yeasts 24/48 h, yeasts 24 h, yeasts 48 h.

A different effect of the calculated and experimental biological activity was found (calculated differently to experimental MIC value) for:

- a) Equations obtained by series I
  - i. NICS (1): Filamentous fungi at 48 and 72 h

b) Equations obtained by series II

i. NICS (1): Yeasts 24 and 48 h.

We found a non-significant effect of the calculated and experimental biological activity (calculated equal to experimental MIC value) for:

a) Equations obtained by series I.

i. NICS (1): Filamentous fungi at 48 h, filamentous fungi at 72 h.

b) Equations obtained by series II

i. NICS (0): Yeasts at 24 and 48 h, yeasts at 24 h, yeasts at 48 h.

ii. NICS (1): Yeasts at 24 h and yeasts at 48 h.

**Table S-4.** Summary of Mann-Whitney U test for the different comparisons between calculated and experimental MICs.

| Series | NICS | Fungi       | Testing time | z       | Mean ranks |              | p      |
|--------|------|-------------|--------------|---------|------------|--------------|--------|
|        |      |             |              |         | Calculated | Experimental |        |
| I      | 1    | Filamentous | 48 and 72 h  | 2.3630  | 11.38      | 5.62         | 0.0180 |
|        |      |             | 48 h         | -1.6290 | 6.50       | 10.50        | 0.1033 |
|        |      |             | 72 h         | 1.0104  | 5.50       | 3.50         | 0.3123 |
| II     | 0    | Yeast       | 24 and 48 h  | -0.3539 | 9.00       | 10.00        | 0.7234 |
|        |      |             | 24 h         | -0.8407 | 4.60       | 6.40         | 0.4005 |
|        |      |             | 48 h         | 0.000   | 4.50       | 4.50         | 1.000  |
|        | 1    | Yeast       | 24 and 48 h  | -1.9798 | 13.19      | 19.81        | 0.0477 |
|        |      |             | 24 h         | -1.2086 | 7.0        | 10.0         | 0.2268 |
|        |      |             | 48 h         | -1.6290 | 6.5        | 10.50        | 0.1033 |

Atomic coordinates for 14

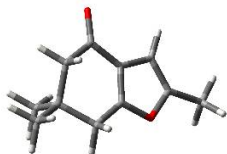

Charge:0 Multiplicity:1

|   |             |             |             |             |
|---|-------------|-------------|-------------|-------------|
| C |             | -0.49912100 | -0.61613900 | -0.23765000 |
| C |             | -0.64935000 | 0.73529600  | -0.10933400 |
| C |             | 0.50909000  | 1.62586000  | -0.14864100 |
| C | 1.83062100  | 0.92471900  | -0.47721200 |             |
| C | 0.76045600  | -1.37882100 | -0.42886800 |             |
| C | -2.66135100 | -0.24006300 | 0.02103400  |             |
| C | -2.06005500 | 0.97407000  | 0.06332100  |             |
| H | 2.64232900  | 1.55272400  | -0.10220000 |             |
| H | 0.87914900  | -1.63169300 | -1.49138000 |             |
| H | -2.54224100 | 1.92893800  | 0.19732000  |             |
| C | 1.97555800  | -0.52949500 | 0.04500000  |             |
| C | 3.26711900  | -1.14391900 | -0.51853900 |             |
| H | 4.14357500  | -0.57887500 | -0.18842100 |             |
| H | 3.38987700  | -2.17694600 | -0.17793000 |             |
| H | 3.26215300  | -1.14763700 | -1.61267100 |             |
| C | 2.05014100  | -0.52800200 | 1.58476300  |             |
| H | 2.19503900  | -1.54341700 | 1.96569700  |             |
| H | 2.89261700  | 0.08008100  | 1.92608000  |             |
| H | 1.14275800  | -0.12428500 | 2.04032100  |             |
| O | 0.44490700  | 2.83062500  | 0.02497600  |             |
| O | -1.70255200 | -1.23005600 | -0.16220100 |             |
| C | -4.06768100 | -0.70513600 | 0.12795400  |             |
| H | -4.72722000 | 0.15101300  | 0.27520900  |             |
| H | -4.38352000 | -1.23135500 | -0.77817800 |             |
| H | -4.19777900 | -1.38947900 | 0.97200700  |             |
| H | 1.91142700  | 0.92477400  | -1.57315800 |             |
| H | 0.72043100  | -2.32861500 | 0.11414000  |             |

Atomic coordinates for 15-1

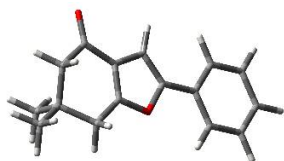

Charge:0 Multiplicity:1

|   |             |             |             |
|---|-------------|-------------|-------------|
| C | 0.90139500  | -0.45638500 | -0.26452200 |
| C | 0.95419800  | 0.90660400  | -0.16724900 |
| C | 2.23647700  | 1.61174000  | -0.18273800 |
| C | 3.44431700  | 0.71108600  | -0.45472000 |
| C | 2.03658100  | -1.40359900 | -0.39714000 |
| C | -1.18754800 | 0.24594400  | -0.08783500 |
| C | -0.40174200 | 1.35996600  | -0.04832300 |
| H | 4.33121100  | 1.21760900  | -0.06660300 |
| H | 2.14745700  | -1.69621800 | -1.45025200 |
| H | -0.72536200 | 2.38296200  | 0.04959000  |
| C | 3.35079700  | -0.73458300 | 0.10141400  |
| C | 4.55119300  | -1.55113700 | -0.40356300 |
| H | 5.49221800  | -1.11553000 | -0.05572700 |
| H | 4.50554000  | -2.58112500 | -0.03572100 |
| H | 4.58026700  | -1.58470700 | -1.49675400 |
| C | 3.37531500  | -0.70541200 | 1.64269100  |
| H | 3.35306200  | -1.72097700 | 2.04900700  |
| H | 4.28824000  | -0.22153400 | 2.00094000  |
| H | 2.52501100  | -0.15895600 | 2.05784900  |
| O | 2.34808800  | 2.81532100  | -0.03125700 |
| O | -0.37969300 | -0.87896800 | -0.21915100 |
| C | -2.62525900 | 0.01713600  | -0.02115000 |
| C | -3.15879600 | -1.27825000 | -0.10925900 |
| C | -3.50797900 | 1.09924400  | 0.13338200  |
| C | -4.53416000 | -1.48175500 | -0.04490300 |
| H | -2.49146300 | -2.12206600 | -0.22856800 |
| C | -4.87993600 | 0.88951100  | 0.19642400  |
| H | -3.11852100 | 2.10796500  | 0.20534200  |
| C | -5.40159200 | -0.40197200 | 0.10770800  |
| H | -4.92853500 | -2.48933900 | -0.11486600 |
| H | -5.54549300 | 1.73700300  | 0.31587000  |
| H | -6.47233100 | -0.56280800 | 0.15727500  |
| H | 3.55560600  | 0.67154000  | -1.54728800 |
| H | 1.83636800  | -2.32348500 | 0.16186100  |

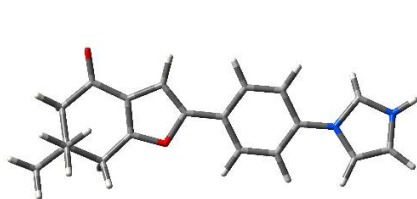

# Atomic coordinates for 15-3

Charge:0 Multiplicity:2

|   |             |             |             |
|---|-------------|-------------|-------------|
| C | -2.61796600 | -0.43550200 | -0.28217100 |
| C | -2.74728900 | 0.91908900  | -0.15039900 |
| C | -4.06813600 | 1.54565500  | -0.13060700 |
| C | -5.22695500 | 0.58197400  | -0.40479200 |
| C | -3.69657600 | -1.44529500 | -0.42354700 |
| C | -0.56712400 | 0.38334200  | -0.11534200 |
| C | -1.41816600 | 1.44954600  | -0.03904800 |
| H | -6.13412400 | 1.02648100  | 0.01184900  |
| H | -3.43405000 | -2.36505200 | 0.10951300  |
| H | -1.15346500 | 2.48739700  | 0.07667100  |
| C | -5.03978100 | -0.86930100 | 0.11155300  |
| C | -5.04037400 | -0.88176800 | 1.65327700  |
| H | -5.97375900 | -0.46245900 | 2.03930800  |
| H | -4.95150700 | -1.90492000 | 2.03073000  |
| H | -4.21609700 | -0.29758400 | 2.06934400  |
| C | -6.19826000 | -1.74257500 | -0.39652000 |
| H | -6.08506800 | -2.77741800 | -0.05788100 |
| H | -7.15748000 | -1.37339600 | -0.02226100 |
| H | -6.24402300 | -1.74865100 | -1.48966900 |
| O | -4.25144200 | 2.73735900  | 0.04914600  |
| O | -1.31269200 | -0.78432100 | -0.26404500 |
| C | 0.87526400  | 0.23427300  | -0.07063400 |
| C | 1.49420100  | -1.02107100 | -0.22286000 |
| C | 1.70783000  | 1.34979800  | 0.12907000  |
| C | 2.87119300  | -1.15668800 | -0.18370700 |
| H | 0.88221800  | -1.89928000 | -0.38459300 |
| C | 3.08523300  | 1.22807600  | 0.17228300  |
| H | 1.26872200  | 2.33119200  | 0.26706900  |
| C | 3.69742300  | -0.03352700 | 0.01537700  |
| H | 3.30408900  | -2.13772900 | -0.33244900 |
| H | 3.69435000  | 2.10172900  | 0.36397900  |
| N | 5.08225300  | -0.14296700 | 0.04432300  |
| C | 5.82667300  | -1.32365700 | 0.18662700  |
| C | 5.97829700  | 0.94531200  | 0.01007000  |
| C | 7.13785200  | -1.00638800 | 0.14684000  |
| H | 5.36305800  | -2.28405800 | 0.31552800  |
| H | 5.74294600  | 1.79245200  | -0.62689600 |
| H | 7.99613600  | -1.64905300 | 0.24848700  |
| N | 7.25705500  | 0.35645300  | -0.06689600 |
| H | 8.08129700  | 0.86962700  | 0.20337400  |
| H | -5.35704100 | 0.56337300  | -1.49587700 |
| H | -3.80832800 | -1.71910800 | -1.48185200 |

Atomic coordinates for 15-11

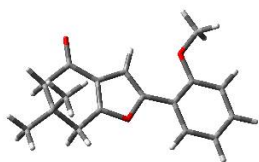

Charge:0 Multiplicity:1

|   |             |             |             |
|---|-------------|-------------|-------------|
| C | -1.38399400 | -0.59957500 | -0.25737500 |
| C | -1.27362900 | 0.76150900  | -0.19642800 |
| C | -2.46273300 | 1.61253500  | -0.22615200 |
| C | -3.77164600 | 0.85523800  | -0.46932700 |
| C | -2.62384600 | -1.40912900 | -0.36245400 |
| C | 0.77948000  | -0.14452700 | -0.11095600 |
| C | 0.12729700  | 1.05566300  | -0.09704900 |
| H | -4.58873900 | 1.47331800  | -0.08957400 |
| H | -2.53120700 | -2.33167800 | 0.21976100  |
| H | 0.58116100  | 2.02642500  | -0.02862800 |
| C | -3.84717300 | -0.57782100 | 0.12192800  |
| C | -3.86122000 | -0.50908000 | 1.66219800  |
| H | -4.70927800 | 0.08732200  | 2.01036400  |
| H | -3.95765900 | -1.51021800 | 2.09303200  |
| H | -2.95060800 | -0.05717800 | 2.06286000  |
| C | -5.13841100 | -1.25830500 | -0.36033800 |
| H | -5.21324800 | -2.27761900 | 0.03180100  |
| H | -6.01944000 | -0.70623900 | -0.02067900 |
| H | -5.17658100 | -1.31348600 | -1.45244100 |
| O | -2.43323900 | 2.82509000  | -0.10791200 |
| O | -0.16391900 | -1.17048600 | -0.20737900 |
| C | 2.16824000  | -0.57915200 | -0.04899900 |
| C | 2.48268600  | -1.94641600 | -0.07804700 |
| C | 3.23918900  | 0.34442200  | 0.04081000  |
| C | 3.79694700  | -2.39737300 | -0.02093400 |
| H | 1.67240800  | -2.65999600 | -0.14684400 |
| C | 4.55752000  | -0.11062100 | 0.09778500  |
| C | 4.83522200  | -1.47661600 | 0.06714000  |
| H | 4.00461300  | -3.46044300 | -0.04506600 |
| H | 5.37418500  | 0.59459000  | 0.16678700  |
| H | 5.86528900  | -1.81115900 | 0.11272600  |
| O | 2.90268500  | 1.66428900  | 0.06671200  |
| C | 3.93231000  | 2.64232100  | 0.15592200  |
| H | 4.50849800  | 2.53068700  | 1.08004000  |
| H | 4.60526100  | 2.59226900  | -0.70616300 |
| H | 3.42395900  | 3.60503700  | 0.16152500  |
| H | -3.89566300 | 0.80224700  | -1.55989800 |
| H | -2.77460900 | -1.71348300 | -1.40732300 |

Atomic coordinates for 15-15

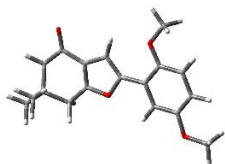

Charge:0 Multiplicity:1

|   |             |             |             |
|---|-------------|-------------|-------------|
| C | -1.77777400 | -0.57324500 | -0.25093900 |
| C | -1.95175000 | 0.78231400  | -0.20964600 |
| C | -3.29158000 | 1.36761700  | -0.25016600 |
| C | -4.41384100 | 0.35148000  | -0.48308400 |
| C | -2.82298700 | -1.62361300 | -0.34186800 |
| C | 0.24325900  | 0.32089000  | -0.11165000 |
| C | -0.64203500 | 1.36089700  | -0.11461000 |
| H | -5.34335700 | 0.79243000  | -0.11489000 |
| H | -2.54104500 | -2.49821900 | 0.25339700  |
| H | -0.39630100 | 2.40484000  | -0.05938900 |
| C | -4.19269600 | -1.05627800 | 0.13168700  |
| C | -4.22163700 | -0.96599500 | 1.67036100  |
| H | -5.17443900 | -0.55111900 | 2.01115400  |
| H | -4.10857700 | -1.95768200 | 2.11865500  |
| H | -3.42366900 | -0.32897700 | 2.05938200  |
| C | -5.31427800 | -1.99683500 | -0.33747200 |
| H | -5.17453800 | -3.00436700 | 0.06691600  |
| H | -6.29068000 | -1.63603900 | -0.00165600 |
| H | -5.34115200 | -2.07213400 | -1.42872500 |
| O | -3.51529900 | 2.56115500  | -0.14749200 |
| O | -0.46673600 | -0.87871500 | -0.19305600 |
| C | 1.69222500  | 0.18662200  | -0.04523400 |
| C | 2.27421100  | -1.08323000 | -0.07486300 |
| C | 2.54626100  | 1.31585300  | 0.04902200  |
| C | 3.65723600  | -1.26026300 | -0.01503100 |
| H | 1.64714500  | -1.96116100 | -0.14668700 |
| C | 3.92261800  | 1.13264800  | 0.10818900  |
| C | 4.48754400  | -0.14712700 | 0.07682400  |
| H | 4.58356800  | 1.98529900  | 0.18012400  |
| H | 5.56338500  | -0.24507200 | 0.12457000  |
| O | 1.94304500  | 2.54204400  | 0.07628800  |
| C | 2.75620200  | 3.70333500  | 0.17066000  |
| H | 3.34249100  | 3.70618000  | 1.09590600  |
| H | 3.42877500  | 3.79080800  | -0.68948400 |
| H | 2.06831300  | 4.54737200  | 0.17749300  |
| O | 4.09078600  | -2.55908700 | -0.05364400 |
| C | 5.48778200  | -2.80224400 | -0.00201300 |
| H | 5.60461800  | -3.88400200 | -0.04616100 |

|   |             |             |             |
|---|-------------|-------------|-------------|
| H | 6.00613500  | -2.34789800 | -0.85419900 |
| H | 5.92631300  | -2.42938500 | 0.93073900  |
| H | -4.51859700 | 0.25672800  | -1.57289100 |
| H | -2.90531200 | -1.96771900 | -1.38202400 |

Atomic coordinates for 15-28

Charge:0 Multiplicity:1

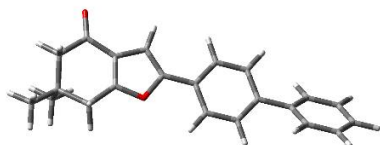

|   |             |             |             |
|---|-------------|-------------|-------------|
| C | 2.88284400  | -0.47913400 | -0.20272200 |
| C | 3.02564100  | 0.87903500  | -0.27363400 |
| C | 4.35242600  | 1.49196500  | -0.34763200 |
| C | 5.49990500  | 0.48793600  | -0.48239800 |
| C | 3.95319800  | -1.50747900 | -0.18951700 |
| C | 0.84315100  | 0.37388600  | -0.16838800 |
| C | 1.70198000  | 1.43103400  | -0.24611000 |
| H | 6.41460200  | 0.97995200  | -0.14339400 |
| H | 4.05730600  | -1.93965400 | -1.19417400 |
| H | 1.44677000  | 2.47710800  | -0.28383200 |
| C | 5.30359100  | -0.86777100 | 0.24772200  |
| C | 6.45280300  | -1.81689700 | -0.12806700 |
| H | 7.41601400  | -1.40345500 | 0.18421500  |
| H | 6.33334700  | -2.78838200 | 0.36186700  |
| H | 6.49399200  | -1.98624100 | -1.20822700 |
| C | 5.31283600  | -0.64693100 | 1.77345900  |
| H | 5.22255500  | -1.60028900 | 2.30253300  |
| H | 6.25066700  | -0.17909400 | 2.08586300  |
| H | 4.49435300  | -0.00167500 | 2.10161000  |
| O | 4.54262000  | 2.69522100  | -0.34282800 |
| O | 1.57527700  | -0.80881500 | -0.13832700 |
| C | -0.60593300 | 0.24941700  | -0.11531800 |
| C | -1.22982300 | -1.00570600 | -0.04767300 |
| C | -1.42143300 | 1.39274500  | -0.13214300 |
| C | -2.61438100 | -1.10892800 | -0.00050600 |
| H | -0.62357900 | -1.90223600 | -0.02321700 |
| C | -2.80293200 | 1.28225600  | -0.08309700 |
| C | -3.43324600 | 0.02904400  | -0.01693900 |
| H | -3.06713200 | -2.09102700 | 0.07512500  |
| H | -3.40601100 | 2.18211800  | -0.12220000 |
| H | -0.97161300 | 2.37682300  | -0.19410100 |
| C | -4.91124800 | -0.08602500 | 0.03352900  |
| C | -5.67939800 | 0.80656800  | 0.79675200  |
| C | -5.58069800 | -1.09178800 | -0.68040900 |
| C | -7.06643300 | 0.69644400  | 0.84567300  |
| H | -5.18369500 | 1.57676400  | 1.37683000  |
| C | -6.96769200 | -1.20182300 | -0.63217800 |

|   |             |             |             |
|---|-------------|-------------|-------------|
| H | -5.01120200 | -1.77681000 | -1.29824200 |
| C | -7.71726700 | -0.30832700 | 0.13141000  |
| H | -7.63902100 | 1.39139700  | 1.44992500  |
| H | -7.46437800 | -1.98110100 | -1.19963500 |
| H | -8.79729600 | -0.39383900 | 0.16907800  |
| H | 3.68412100  | -2.33295600 | 0.47752400  |
| H | 5.61966900  | 0.30422500  | -1.55918800 |

# Atomic coordinates for 15-32

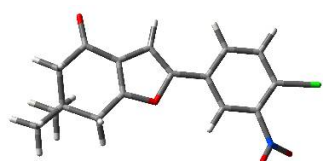

Charge:0 Multiplicity:1

|    |             |             |             |
|----|-------------|-------------|-------------|
| C  | -2.24672900 | 0.31865900  | -0.25415000 |
| C  | -2.51282100 | -1.02007800 | -0.16795300 |
| C  | -3.89181300 | -1.51679800 | -0.17285300 |
| C  | -4.94496400 | -0.43628900 | -0.42453900 |
| C  | -3.22021100 | 1.43203200  | -0.37094400 |
| C  | -0.29685900 | -0.70535300 | -0.10720500 |
| C  | -1.24647400 | -1.68368800 | -0.06828700 |
| H  | -5.06093600 | -0.37228400 | -1.51547700 |
| H  | -3.29156200 | 1.74228100  | -1.42213000 |
| H  | -1.08932300 | -2.74638200 | 0.01862100  |
| C  | -4.61850000 | 0.97385800  | 0.13800600  |
| C  | -5.67869600 | 1.97248300  | -0.35347100 |
| H  | -6.67318300 | 1.69195600  | 0.00446800  |
| H  | -5.46539000 | 2.98117900  | 0.01364100  |
| H  | -5.71345800 | 2.01167800  | -1.44632600 |
| C  | -4.63254000 | 0.93997900  | 1.67915200  |
| H  | -4.43782200 | 1.93521500  | 2.08947500  |
| H  | -5.60948600 | 0.61301700  | 2.04553400  |
| H  | -3.88135000 | 0.25760000  | 2.08474800  |
| O  | -4.18269500 | -2.68967700 | -0.02690600 |
| O  | -0.91381800 | 0.53333700  | -0.21826200 |
| C  | 1.15619000  | -0.70629500 | -0.05502700 |
| C  | 1.87854200  | 0.49020200  | -0.09486300 |
| C  | 1.87540700  | -1.91035400 | 0.03163500  |
| C  | 3.26595700  | 0.47799200  | -0.02114500 |
| H  | 1.37137100  | 1.44082900  | -0.18085600 |
| C  | 3.26012600  | -1.91475300 | 0.07667800  |
| C  | 3.98112100  | -0.71919400 | 0.05952100  |
| H  | 3.80207400  | -2.85055600 | 0.12132500  |
| H  | 1.34897600  | -2.85659100 | 0.05536300  |
| Cl | 5.72004000  | -0.79728400 | 0.06225300  |

|   |             |             |             |
|---|-------------|-------------|-------------|
| N | 3.93210000  | 1.79919200  | -0.02484700 |
| O | 3.49580500  | 2.63429300  | -0.80668000 |
| O | 4.84296800  | 1.97842800  | 0.76682600  |
| H | -2.87360200 | 2.30617600  | 0.18905400  |
| H | -5.89617700 | -0.80011000 | -0.02896100 |

Atomic coordinates for 15-33

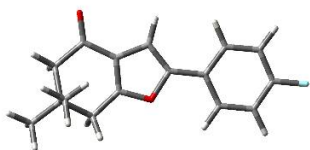

Charge:0 Multiplicity:1

|   |             |             |             |
|---|-------------|-------------|-------------|
| C | -1.28863800 | -0.44769200 | -0.26788500 |
| C | -1.37047100 | 0.91340500  | -0.17023400 |
| C | -2.66813300 | 1.59078600  | -0.17860800 |
| C | -3.85721500 | 0.66425700  | -0.44487200 |
| C | -2.40341500 | -1.41955100 | -0.39422800 |
| C | 0.78497500  | 0.30049600  | -0.10158200 |
| C | -0.02422900 | 1.39712700  | -0.05817100 |
| H | -4.75318500 | 1.15129400  | -0.05277100 |
| H | -2.18049000 | -2.33452300 | 0.16420700  |
| H | 0.27621400  | 2.42746600  | 0.03734800  |
| C | -3.72931900 | -0.77883800 | 0.11120200  |
| C | -3.74598100 | -0.74970000 | 1.65256600  |
| H | -4.66707600 | -0.28557200 | 2.01586500  |
| H | -3.69952200 | -1.76441000 | 2.05892300  |
| H | -2.90546700 | -0.18488800 | 2.06314500  |
| C | -4.91434100 | -1.62137600 | -0.38733300 |
| H | -4.84445800 | -2.65009300 | -0.01987800 |
| H | -5.86262100 | -1.20620800 | -0.03431700 |
| H | -4.94869600 | -1.65540800 | -1.48033600 |
| O | -2.80389600 | 2.79149700  | -0.02561300 |
| O | 0.00275700  | -0.84194100 | -0.22895700 |
| C | 2.22720900  | 0.10145600  | -0.04238800 |
| C | 2.78778500  | -1.18133500 | -0.14645200 |
| C | 3.08915100  | 1.19888600  | 0.12050000  |
| C | 4.16569200  | -1.36649900 | -0.09086000 |
| H | 2.13962200  | -2.03861400 | -0.27225200 |
| C | 4.46608700  | 1.02550000  | 0.17651900  |
| C | 4.98100400  | -0.25833700 | 0.06938800  |
| H | 5.13691800  | 1.86610600  | 0.30213400  |
| H | 2.68240400  | 2.19922400  | 0.20603600  |
| H | 4.60635900  | -2.35241200 | -0.17046200 |
| F | 6.32381800  | -0.43188800 | 0.12411700  |

|   |             |             |             |
|---|-------------|-------------|-------------|
| H | -3.97266300 | 0.62209500  | -1.53691300 |
| H | -2.51353800 | -1.71502000 | -1.44659200 |

Atomic coordinates for 15-34

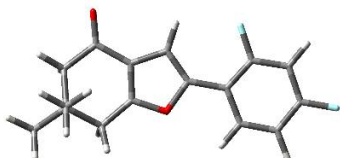

Charge:0 Multiplicity:1

|   |             |             |             |
|---|-------------|-------------|-------------|
| C | -1.44954400 | -0.52250100 | -0.26944200 |
| C | -1.50099500 | 0.84038600  | -0.18014700 |
| C | -2.78527200 | 1.54538600  | -0.19071200 |
| C | -3.99346000 | 0.64200800  | -0.45200400 |
| C | -2.58471300 | -1.47134800 | -0.38909900 |
| C | 0.63976700  | 0.18166800  | -0.11090600 |
| C | -0.14512100 | 1.29754600  | -0.07281300 |
| H | -4.87904200 | 1.15019100  | -0.06330100 |
| H | -2.38045600 | -2.38764700 | 0.17426300  |
| H | 0.18585200  | 2.31717400  | 0.01763900  |
| C | -3.89620700 | -0.79985100 | 0.11315000  |
| C | -3.91120500 | -0.76069400 | 1.65431000  |
| H | -4.82242000 | -0.27548000 | 2.01488200  |
| H | -3.88548100 | -1.77349400 | 2.06726700  |
| H | -3.05929800 | -0.21037100 | 2.06113500  |
| C | -5.09890300 | -1.62052500 | -0.37950700 |
| H | -5.05020200 | -2.64821800 | -0.00575800 |
| H | -6.03796400 | -1.18350100 | -0.02837200 |
| H | -5.13479800 | -1.66053700 | -1.47225800 |
| O | -2.89649400 | 2.74853900  | -0.04273700 |
| O | -0.16815400 | -0.94598800 | -0.22959300 |
| C | 2.06998700  | -0.07757300 | -0.05454000 |
| C | 2.58193000  | -1.38630700 | -0.11922100 |
| C | 3.01220300  | 0.95172200  | 0.06619600  |
| C | 3.94555900  | -1.64678500 | -0.06614700 |
| H | 1.88645000  | -2.20920600 | -0.21304800 |
| C | 4.37744500  | 0.73264000  | 0.12204600  |
| C | 4.82066000  | -0.57834300 | 0.05387000  |
| H | 5.06710800  | 1.56066900  | 0.21567600  |
| H | 4.32980700  | -2.65719800 | -0.11660500 |
| F | 6.15042000  | -0.81434200 | 0.10676300  |
| F | 2.58460600  | 2.23292600  | 0.13330200  |
| H | -4.10917100 | 0.59544200  | -1.54382400 |
| H | -2.70121400 | -1.77005300 | -1.43983100 |

Atomic coordinates for 15-41

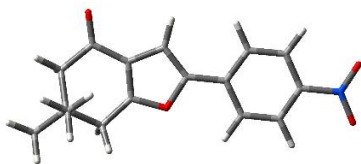

Charge:0 Multiplicity:1

|   |             |             |             |
|---|-------------|-------------|-------------|
| C | -1.94658600 | -0.44590000 | -0.27116500 |
| C | -2.05744700 | 0.91482000  | -0.17435500 |
| C | -3.37075500 | 1.56695200  | -0.17280600 |
| C | -4.54072200 | 0.61617600  | -0.43161500 |
| C | -3.04340500 | -1.43831100 | -0.38907500 |
| C | 0.10906600  | 0.34583500  | -0.12070900 |
| C | -0.72453700 | 1.42647900  | -0.07261200 |
| H | -4.66078900 | 0.57007900  | -1.52302300 |
| H | -2.79808900 | -2.34911600 | 0.16633900  |
| H | -0.44564600 | 2.46322700  | 0.02100000  |
| C | -4.37818100 | -0.82329600 | 0.12613600  |
| C | -4.38256100 | -0.79198300 | 1.66748400  |
| H | -5.31053100 | -0.34782400 | 2.03774400  |
| H | -4.31043000 | -1.80461700 | 2.07497900  |
| H | -3.55177700 | -0.20807500 | 2.07149300  |
| C | -5.54892100 | -1.69108100 | -0.36243400 |
| H | -5.45448000 | -2.71766300 | 0.00505300  |
| H | -6.50258000 | -1.29564400 | -0.00176500 |
| H | -5.59162300 | -1.72641900 | -1.45505400 |
| O | -3.52500800 | 2.76378300  | -0.01605400 |
| O | -0.64890000 | -0.81309800 | -0.24096100 |
| C | 1.55114600  | 0.18335600  | -0.07034500 |
| C | 2.13923800  | -1.09131600 | -0.15624600 |
| C | 2.38741500  | 1.30730000  | 0.06648200  |
| C | 3.51732100  | -1.24126500 | -0.10753200 |
| H | 1.50907500  | -1.96415800 | -0.26174800 |
| C | 3.76402800  | 1.16649000  | 0.11570500  |
| H | 1.95645000  | 2.29826900  | 0.13582900  |
| C | 4.31626100  | -0.11008500 | 0.02775200  |
| H | 3.97949400  | -2.21655300 | -0.17270100 |
| H | 4.41458500  | 2.02352800  | 0.22114800  |
| N | 5.77984400  | -0.26477500 | 0.08007400  |
| O | 6.45658800  | 0.75072400  | 0.19953900  |
| O | 6.23703200  | -1.39978600 | 0.00110500  |
| H | -5.44480600 | 1.08437400  | -0.03560100 |
| H | -3.15360100 | -1.73399200 | -1.44122100 |
